# Supplementary material for: Water-Borne ZnO/Acrylic Nanocoating: Fabrication, Characterization, and Properties
Source: MDPI journal article supplement (doi:10.3390/polym13050717), 2021-02-26
Supplement: s1 [file s1]

# Water-Borne ZnO/Acrylic Nanocoating: Fabrication, Characterization, and Properties

Tien Viet Vu<sup>1</sup>, Thien Vuong Nguyen<sup>2,3,\*</sup>, Mohammad Tabish<sup>4</sup>, Sehrish Ibrahim<sup>5</sup>, Thi Huong Thuy Hoang<sup>6</sup>, Ram K. Gupta<sup>7,\*</sup>, Thi My Linh Dang<sup>2</sup>, Tuan Anh Nguyen<sup>2,\*</sup> and Ghulam Yasin<sup>4,8,\*</sup>

<sup>1</sup> Faculty of Chemical Technology, Hanoi University of Industry, BacTuLiem, Hanoi 122300, Vietnam; vuviet.tphn@gmail.com

<sup>2</sup> Institute for Tropical Technology, Vietnam Academy of Science and Technology, Hanoi 122300, Vietnam; dangthimylinh.lhda58@gmail.com

<sup>3</sup> Graduate University of Science and Technology, Vietnam Academy of Science and Technology, 18 Hoang Quoc Viet, CauGiay, Hanoi 122300, Vietnam

<sup>4</sup> State Key Laboratory of Chemical Resource Engineering, College of Materials Science and Engineering, Beijing University of Chemical Technology, Beijing 100029, China; tabish.5000@buct.edu.cn

<sup>5</sup> Department of Zoology, University of Education, Lahore, Punjab 54770, Pakistan; sehrish.ibrahim@yahoo.com

<sup>6</sup> Hong Duc University, 565 Quang Trung, Dong Ve, Thanh Hoa 4000, Thanh Hoa Province, Vietnam; hhthuyhd77@gmail.com

<sup>7</sup> Department of Chemistry, Kansas Polymer Research Center, Pittsburg State University, Pittsburg, KS 66762, USA

<sup>8</sup> Institute for Advanced Study, College of Physics and Optoelectronic Engineering, Shenzhen University, Shenzhen, Guangdong 518060, China

\* Correspondence: vuongvast@gmail.com (T.V.N.); ramguptamsu@gmail.com (R.K.G.); ntanh@itt.vast.vn (T.A.N.); yasin@mail.buct.edu.cn (G.Y.)

## Mechanism of the decomposition of methylene blue

The radicals and intermediates such as  $\bullet\text{OH}$  and  $\text{O}_2\bullet$  (as mentioned in the introduction) play an important role in the photolysis mechanism of organic compounds. According to Feng et al, [1] the  $\bullet\text{OH}$  radical is the main oxidizing agent for the decomposition of methylene blue and other intermediates. Since methylene blue is a cationic dye, it is unable to donor electron. The initiation stage is the broken of  $\text{C-S}^+=\text{C}$  bond of methylene blue:

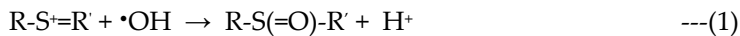

The second  $\bullet\text{OH}$  radical continuously attacks the sulfoxide radical to form sulfone compound, dividing 2 benzene rings by reactions (2) and (3):

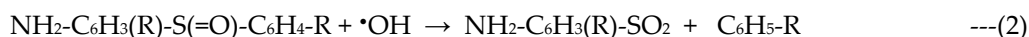

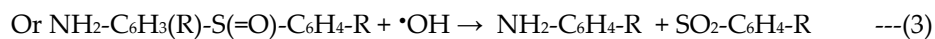

After formed, the sulfone compound instantly reacts with the third  $\bullet\text{OH}$  radical to generate sulfonic acid:

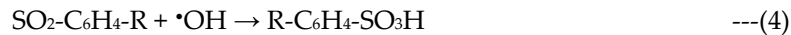

Finally, the fourth  $\bullet\text{OH}$  radical will attack sulfonic acid to release sulfate ion:

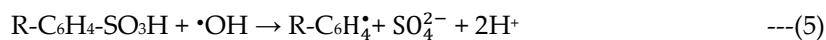

Besides, the  $\bullet\text{OH}$  radical can replace the amine group in the methylene blue molecule to create phenol and let out  $\text{NH}_2\bullet$  radical:

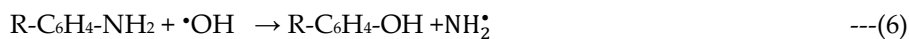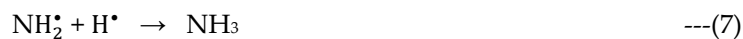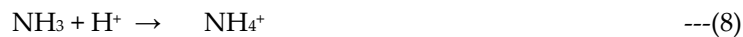

The two symmetric dimethyl-phenyl-amino groups of methylene blue are attacked by  $\bullet\text{OH}$  radical, generating ancol, aldehyde, the acid in order. Finally, the leaving carboxyl group is oxidized to form  $\text{CO}_2$  according to the Kolbe photo reaction [1].

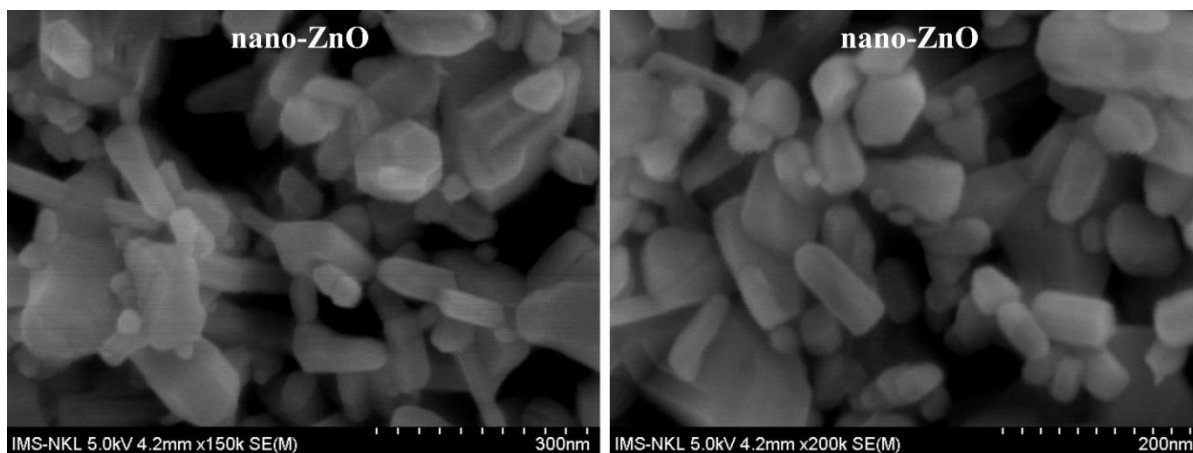

**Figure S1.** SEM micrograph of the nano-ZnO particles at different magnifications.

#### Reference

- [1] F.P Feng, Z. Zhuo, Peng Peng, and D.X Gang, Photodegradation of Methylene Blue in a Batch Fixed bed Photoreactor Using Activated Carbon fibers supported  $\text{TiO}_2$  photocatalyst, The Chinese J. Proc. Eng., 2008, 1(8), 65-71.
